# Supplementary material
Source: ML conference proceedings conference paper supplement (https://proceedings.mlr.press/v89/rangi19a.html)
Supplement: Supplementary file [file rangi19a-supp.pdf]

---

# Online learning with feedback graphs and switching costs

---

## A Proof of Theorem 1

*Proof.* Without loss of generality, let the independent sequence set  $\mathcal{I}(G_{1:T})$  formed of actions (or “arms”) from 1 to  $\beta(G_{1:T})$ . Given the sequence of feedback graphs  $G_{1:T}$ , let  $T_i$  be the number of times the action  $i \in \mathcal{I}(G_{1:T}) = [\beta(G_{1:T})]$  is selected by the player in  $T$  rounds. Let  $T_\Delta$  be the total number of times the actions are selected from the set  $[K] \setminus \mathcal{I}(G_{1:T})$ . Let  $\mathbb{E}_i$  denote expectation conditioned on  $X = i$ , and  $\mathbb{P}_i$  denote the probability conditioned on  $X = i$ . Additionally, we define  $\mathbb{P}_0$  as the probability conditioned on event  $\epsilon_1 = 0$ . Therefore, under  $\mathbb{P}_0$ , all the actions in the independent sequence set, i.e.  $i \in \mathcal{I}(G_{1:T})$ , incur an expected regret of  $1/2$ , whereas, the expected regret of actions  $i \in [K] \setminus \mathcal{I}(G_{1:T})$  is  $1/2 + \epsilon_2$ . Let  $\mathbb{E}_0$  be the corresponding conditional expectation. For all  $i \in [K]$  and  $t \leq T$ ,  $\ell_t(i)$  and  $\ell_t^c(i)$  denote the unclipped and clipped loss of the action  $i$  respectively. Assuming the unclipped losses are observed by the player, then  $\mathcal{F}$  is the sigma field generated by the unclipped losses, and  $S_t(i_t)$  is the set of actions whose losses are observed at time  $t$ , following the selection of  $i_t$ , according to the feedback graph  $G_t$ . The observed sequence of unclipped losses will be referred as  $\ell_{1:T}^o$ . Additionally,  $\mathcal{F}'$  is the sigma field generated by the clipped losses, for all  $t \in [T]$ ,  $\ell_t^c(i)$  where  $i \in S_t(i_t)$ , and the observed sequence of clipped losses will be referred as  $\ell_{1:T}^c$ . By definition,  $\mathcal{F}' \subseteq \mathcal{F}$ .

Let  $i_1, \dots, i_T$  be the sequence of actions selected by a player over the time horizon  $T$ . Then, the regret  $R^c$  of the player corresponding to clipped losses is

$$R^c = \sum_{t=1}^T \ell_t^c(i_t) + c \cdot M_s - \min_{i \in [K]} \sum_{t=1}^T \ell_t^c(i), \quad (1)$$

where  $M_s$  is the number of switches in the action selection sequence  $i_1, \dots, i_T$ , and  $c$  is the cost of each switch in action. Now, we define the regret  $R$  which corresponds to the unclipped loss function in Algorithm 1 as following

$$R = \sum_{t=1}^T \ell_t(i_t) + c \cdot M_s - \min_{i \in [K]} \sum_{t=1}^T \ell_t(i). \quad (2)$$

Using (Dekel et al., 2014, Lemma 4), we have

$$\mathbb{P}\left(\text{For all } t \in [T], \frac{1}{2} + W_t \in \left[\frac{1}{6}, \frac{5}{6}\right]\right) \geq \frac{5}{6}. \quad (3)$$

Thus, for all  $T > \max\{\beta(G_{1:T}), 6\}$ , we have  $\epsilon_1 = \epsilon_2 < 1/6$ . If  $B = \{\text{For all } t \in [T] : 1/2 + W_t \in [1/6, 5/6]\}$  occurs and  $\epsilon_1 = \epsilon_2 < 1/6$ , then for all  $i \in [K]$ ,  $\ell_t^c(i) = \ell_t(i)$  which implies  $R^c = R$  (see (1) and (2)). Now, if the event  $B$  does not occur, then the losses at any time  $t$  satisfy

$$\ell_t(i) - \ell_t^c(i) \leq (\epsilon_1 + \epsilon_2).$$

Therefore, we have

$$c \cdot M_s \leq R^c \leq R \leq c \cdot M_s + (\epsilon_1 + \epsilon_2)T.$$

Now, for  $T > \max\{\beta(G_{1:T}), 6\}$ , we have

$$\mathbb{E}[R] - \mathbb{E}[R^c] = (1 - \mathbb{P}(B))\mathbb{E}[R - R^c | B \text{ does not occur}] \leq \frac{(\epsilon_1 + \epsilon_2)T}{6}. \quad (4)$$

Thus, (4) lower bounds the actual regret  $R^c$  in terms of regret  $R$ . Now, we derive the lower bound on regret  $R$  corresponding to the unclipped losses. Using the definition of  $R$ , we have

$$\begin{aligned}
\mathbb{E}[R] &= \max_{i \in [K]} \mathbb{E} \left[ \sum_{t=1}^T \ell_t(i_t) - \sum_{t=1}^T \ell_t(i) \right] + \mathbb{E}[M_s] \\
&= \frac{1}{\beta(G_{1:T})} \sum_{i=1}^{\beta(G_{1:T})} \mathbb{E}_i \left[ \sum_{t=1}^T \ell_t(i_t) - \min_{i \in [K]} \sum_{t=1}^T \ell_t(i) \right] + \mathbb{E}[M_s] \\
&= \frac{1}{\beta(G_{1:T})} \sum_{i=1}^{\beta(G_{1:T})} \mathbb{E}_i \left[ \sum_{j \in \mathcal{I}(G_{1:T}) \setminus \{i\}} \frac{1}{2} T_j + \left( \frac{1}{2} - \epsilon_1 \right) T_i + \left( \frac{1}{2} + \epsilon_2 \right) T_\Delta - \left( \frac{1}{2} - \epsilon_1 \right) T \right] + \mathbb{E}[M_s] \\
&= \frac{1}{\beta(G_{1:T})} \sum_{i=1}^{\beta(G_{1:T})} \mathbb{E}_i \left[ \sum_{j=1}^{\beta(G_{1:T})} \frac{1}{2} T_j + \left( \frac{1}{2} + \epsilon_2 \right) T_\Delta - \epsilon_1 T_i - \left( \frac{1}{2} - \epsilon_1 \right) T \right] + \mathbb{E}[M_s] \\
&\stackrel{(a)}{=} \frac{1}{\beta(G_{1:T})} \sum_{i=1}^{\beta(G_{1:T})} \mathbb{E}_i \left[ \epsilon_2 T_\Delta + \epsilon_1 (T - T_i) \right] + \mathbb{E}[M_s] \\
&\stackrel{(b)}{\geq} \epsilon_1 \left( T - \frac{1}{\beta(G_{1:T})} \sum_{i=1}^{\beta(G_{1:T})} \mathbb{E}_i [T_i] \right) + \mathbb{E}[M_s],
\end{aligned} \tag{5}$$

where (a) follows from  $\sum_{j=1}^{\beta(G_{1:T})} T_j + T_\Delta = T$ , and (b) follows from  $\epsilon_2 T_\Delta \geq 0$ .

Now, we upper bound the  $\mathbb{E}_i [T_i]$  in (5) to obtain the lower bound on the expected regret  $\mathbb{E}[R]$ . Since the player is deterministic, the event  $\{i_t = i\}$  is  $\mathcal{F}'$  measurable. Therefore, we have

$$\mathbb{P}_i(i_t = i) - \mathbb{P}_0(i_t = i) \leq d_{TV}^{\mathcal{F}'}(P_0, P_i) \stackrel{(a)}{\leq} d_{TV}^{\mathcal{F}}(P_0, P_i),$$

where  $d_{TV}^{\mathcal{F}}(P_0, P_i) = \sup_{A \in \mathcal{F}} |\mathbb{P}_0(A) - \mathbb{P}_i(A)|$  is the total variational distance between the two probability measures, and (a) follows from  $\mathcal{F}' \subseteq \mathcal{F}$ . Summing the above equation over  $t \in [T]$  and  $i \in \mathcal{I}(G_{1:T})$  yields

$$\sum_{i=1}^{\beta(G_{1:T})} (\mathbb{E}_i [T_i] - \mathbb{E}_0 [T_i]) \leq T \cdot \sum_{i=1}^{\beta(G_{1:T})} d_{TV}^{\mathcal{F}}(P_0, P_i).$$

Rearranging the above equation and using  $\sum_{i=1}^{\beta(G_{1:T})} \mathbb{E}_0 [T_i] = \mathbb{E}_0 [\sum_{i=1}^{\beta(G_{1:T})} T_i] = T$ , we get

$$\sum_{i=1}^{\beta(G_{1:T})} \mathbb{E}_i [T_i] \leq T \cdot \sum_{i=1}^{\beta(G_{1:T})} d_{TV}^{\mathcal{F}}(P_0, P_i) + T.$$

Combining the above equation with (5), we get

$$\begin{aligned}
\mathbb{E}[R] &\geq \epsilon_1 T - \frac{\epsilon_1 T}{\beta(G_{1:T})} \cdot \sum_{i=1}^{\beta(G_{1:T})} d_{TV}^{\mathcal{F}}(P_0, P_i) - \frac{\epsilon_1 T}{\beta(G_{1:T})} + \mathbb{E}[M_s] \\
&\stackrel{(a)}{\geq} \frac{\epsilon_1 T}{2} - \frac{\epsilon_1 T}{\beta(G_{1:T})} \cdot \sum_{i=1}^{\beta(G_{1:T})} d_{TV}^{\mathcal{F}}(P_0, P_i) + \mathbb{E}[M_s],
\end{aligned} \tag{6}$$

where (a) uses the fact that  $\beta(G_{1:T}) > 1$ . Next, we upper bound the second term in the right hand side of (6). Using Pinsker's inequality, we have

$$d_{TV}^{\mathcal{F}}(P_0, P_i) \leq \sqrt{\frac{1}{2} D_{KL}(\mathbb{P}_0(\ell_{1:T}^o) \parallel \mathbb{P}_i(\ell_{1:T}^o))}, \tag{7}$$

where  $\ell_{1:T}^o$  are the losses observed by the player over the time horizon  $T$ . Using the chain rule of relative entropy to decompose  $D_{KL}(\mathbb{P}_0(\ell_{1:T}^o) \parallel \mathbb{P}_i(\ell_{1:T}^o))$ , we get

$$\begin{aligned} D_{KL}(\mathbb{P}_0(\ell_{1:T}^o) \parallel \mathbb{P}_i(\ell_{1:T}^o)) &= \sum_{t=1}^T D_{KL}(\mathbb{P}_0(\ell_t^o \mid \ell_{1:t-1}^o) \parallel \mathbb{P}_i(\ell_t^o \mid \ell_{1:t-1}^o)) \\ &= \sum_{t=1}^T D_{KL}(\mathbb{P}_0(\ell_t^o \mid \ell_{\rho^*(t)}^o) \parallel \mathbb{P}_i(\ell_t^o \mid \ell_{\rho^*(t)}^o)), \end{aligned} \quad (8)$$

where  $\rho^*(t)$  is the set of time instances  $0 \leq k \leq t$  encountered when operation  $\rho(\cdot)$  in Algorithm 1 is applied recursively to  $t$ . Now, we deal with each term  $D_{KL}(\mathbb{P}_0(\ell_t^o \mid \ell_{\rho^*(t)}^o) \parallel \mathbb{P}_i(\ell_t^o \mid \ell_{\rho^*(t)}^o))$  in the summation individually. For  $i \in \mathcal{I}(G_{1:T})$ , we separate this computation into four cases:  $i_t$  is such that loss of action  $i$  is observed at both time instances  $t$  and  $\rho(t)$  i.e.  $i \in S_t(i_t)$  and  $i \in S_t(i_{\rho(t)})$ ;  $i_t$  is such that loss of action  $i$  is observed at time instance  $t$  but not at time instance  $\rho(t)$  i.e.  $i \in S_t(i_t)$  and  $i \notin S_t(i_{\rho(t)})$ ;  $i_t$  is such that loss of action  $i$  is not observed at time instance  $t$  but is observed at time instance  $\rho(t)$  i.e.  $i \notin S_t(i_t)$  and  $i \in S_t(i_{\rho(t)})$ ;  $i_t$  is such that loss of action  $i$  is not observed at both time instances  $t$  and  $\rho(t)$  i.e.  $i \notin S_t(i_t)$  and  $i \notin S_t(i_{\rho(t)})$ . Note that at a single time instance the loss of only one single action can be observed from  $\mathcal{I}(G_{1:T})$  arms.

*Case 1:* Since the loss of action  $i$  is observed from the independent sequence set  $\mathcal{I}(G_{1:T})$  at both the time instances, the loss distribution for the action  $i$  is  $\ell_t^o(i) \mid \ell_{\rho^*(t)}^o \sim \mathcal{N}(\ell_{\rho(t)}(i), \sigma^2)$  for both  $\mathbb{P}_0$  and  $\mathbb{P}_i$ . For all  $j \in [K] \setminus \mathcal{I}(G_{1:T})$ , the loss distribution is  $\ell_t^o(j) \mid \ell_{\rho^*(t)}^o \sim \mathcal{N}(\ell_{\rho(t)}(i) + \epsilon_1 + \epsilon_2, \sigma^2)$  under both  $\mathbb{P}_0$  and  $\mathbb{P}_i$ .

*Case 2:* Since the loss of action  $i$  is observed from the independent sequence set  $\mathcal{I}(G_{1:T})$  at time instance  $t$  but not at  $\rho(t)$ , therefore, there exists an action  $k' \in \mathcal{I}(G_{1:T}) \setminus \{i\}$  from the independent sequence set which was observed at time instance  $\rho(t)$ . Then, the loss distribution for the action  $i$  is  $\ell_t^o(i) \mid \ell_{\rho^*(t)}^o \sim \mathcal{N}(\ell_{\rho(t)}(k'), \sigma^2)$  under  $\mathbb{P}_0$ , and  $\ell_t^o(i) \mid \ell_{\rho^*(t)}^o \sim \mathcal{N}(\ell_{\rho(t)}(k') - \epsilon_1, \sigma^2)$  under  $\mathbb{P}_i$ . For all  $j \in [K] \setminus \mathcal{I}(G_{1:T})$ , the loss distribution is  $\ell_t^o(j) \mid \ell_{\rho^*(t)}^o \sim \mathcal{N}(\ell_{\rho(t)}(k') + \epsilon_2, \sigma^2)$  under both  $\mathbb{P}_0$  and  $\mathbb{P}_i$ .

*Case 3:* Since the action  $i$  is observed from the independent sequence set  $\mathcal{I}(G_{1:T})$  at time instance  $\rho(t)$  but not at  $t$ , therefore, there exists an action  $k' \in \mathcal{I}(G_{1:T}) \setminus \{i\}$  from the independent sequence set which was observed at time instance  $t$ . Then, the loss distribution for the arm  $k'$  is  $\ell_t^o(k') \mid \ell_{\rho^*(t)}^o \sim \mathcal{N}(\ell_{\rho(t)}(i), \sigma^2)$  under  $\mathbb{P}_0$ , and  $\ell_t^o(k') \mid \ell_{\rho^*(t)}^o \sim \mathcal{N}(\ell_{\rho(t)}(i) + \epsilon_1, \sigma^2)$  under  $\mathbb{P}_i$ . For all  $j \in [K] \setminus \mathcal{I}(G_{1:T})$ , the loss distribution is  $\ell_t^o(j) \mid \ell_{\rho^*(t)}^o \sim \mathcal{N}(\ell_{\rho(t)}(i) + \epsilon_1 + \epsilon_2, \sigma^2)$  under both  $\mathbb{P}_0$  and  $\mathbb{P}_i$ .

*Case 4:* Let  $k^*$  be the arm from the independent sequence set observed at time instance  $\rho(t)$ . Since the arm  $i$  is not observed from the independent sequence set  $\mathcal{I}(G_{1:T})$  at the time instances  $t$  and  $\rho(t)$ , therefore the loss distribution for all arms  $k' \in \mathcal{I}(G_{1:T}) \setminus \{i\}$  is  $\ell_t^o(k') \mid \ell_{\rho^*(t)}^o \sim \mathcal{N}(\ell_{\rho(t)}(k^*), \sigma^2)$  for both  $\mathbb{P}_0$  and  $\mathbb{P}_i$ . For all  $j \in [K] \setminus \mathcal{I}(G_{1:T})$ , the loss distribution is  $\ell_t^o(j) \mid \ell_{\rho^*(t)}^o \sim \mathcal{N}(\ell_{\rho(t)}(k^*) + \epsilon_2, \sigma^2)$  under both  $\mathbb{P}_0$  and  $\mathbb{P}_i$ .

Therefore, we have

$$\begin{aligned} D_{KL}(\mathbb{P}_0(\ell_t^o \mid \ell_{\rho^*(t)}^o) \parallel \mathbb{P}_i(\ell_t^o \mid \ell_{\rho^*(t)}^o)) &= \mathbb{P}_0(i \in S_t(i_t), i \notin S_{\rho(t)}(i_{\rho(t)})) \cdot D_{KL}(\mathcal{N}(0, \sigma^2) \parallel \mathcal{N}(-\epsilon_1, \sigma^2)) \\ &\quad + \mathbb{P}_0(i \notin S_t(i_t), i \in S_{\rho(t)}(i_{\rho(t)})) \cdot D_{KL}(\mathcal{N}(0, \sigma^2) \parallel \mathcal{N}(\epsilon_1, \sigma^2)) \\ &= \frac{\epsilon_1^2}{2\sigma^2} \mathbb{P}_0(B_t), \end{aligned} \quad (9)$$

where  $B_t = \{i \in S_t(i_t), i \notin S_{\rho(t)}(i_{\rho(t)}) \cup i \notin S_t(i_t), i \in S_{\rho(t)}(i_{\rho(t)})\}$ . The event  $B_t$  implies that the player has switched at least once between the feedback systems  $S_t(k_1)$  and  $S_{\rho(t)}(k_2)$  such that  $i \in S_t(k_1)$  but  $i \notin S_{\rho(t)}(k_2)$  or vice-versa. Let  $N_i$  be the number of times a player switches from the feedback system which includes  $i$  to the feedback system which does not include  $i$  and vice-versa. Then, using (8) and (9), we have

$$D_{KL}(\mathbb{P}_0(\ell_{1:T}^o) \parallel \mathbb{P}_i(\ell_{1:T}^o)) \leq \frac{\epsilon_1^2 \omega(\rho)}{2\sigma^2} \mathbb{E}_0[N_i], \quad (10)$$

where  $\omega(\rho)$  is the width of process  $\rho(\cdot)$  (see Definition 2 in Dekel et al. (2014)) and is bounded above by  $2 \log_2(T)$ . Combining (7) and (10), we have

$$\sup_{A \in \mathcal{F}} (\mathbb{P}_0(A) - \mathbb{P}_i(A)) \leq \frac{\epsilon_1}{\sigma} \sqrt{\log_2(T) \mathbb{E}_0[N_i]}. \quad (11)$$

If  $M_s \geq \epsilon_1 T$ , then  $\mathbb{E}[R'] > \epsilon_1 T$ . Thus, the claimed lower bound follows. Now, let us assume  $M_s \leq \epsilon_1 T$ . For all  $i \in \mathcal{I}(G_{1:T})$ , we have

$$\begin{aligned} \mathbb{E}_0[M_s] - \mathbb{E}_i[M_s] &= \sum_{m=1}^{\lfloor \epsilon_1 T \rfloor} \mathbb{P}_0(M_s \geq m) - \mathbb{P}_i(M_s \geq m) \\ &\leq \epsilon_1 T \cdot d_{TV}^{\mathcal{F}}(\mathbb{P}_0, \mathbb{P}_i). \end{aligned} \quad (12)$$

Using the above equation, we have

$$\begin{aligned} \mathbb{E}_0[M_s] - \mathbb{E}[M_s] &= \frac{1}{\beta(G_{1:T})} \sum_{i=1}^{\beta(G_{1:T})} (\mathbb{E}_0[M_s] - \mathbb{E}_i[M_s]) \\ &\leq \frac{\epsilon_1 T}{\beta(G_{1:T})} \sum_{i=1}^{\beta(G_{1:T})} d_{TV}^{\mathcal{F}}(\mathbb{P}_0, \mathbb{P}_i). \end{aligned} \quad (13)$$

Now, combining (4), (6), (11) and (13), we obtain

$$\begin{aligned} \mathbb{E}[R'] &\geq \frac{\epsilon_1 T}{6} - \frac{\epsilon_1 T}{\beta(G_{1:T})} \sum_{i=1}^{\beta(G_{1:T})} \frac{\epsilon_1}{\sigma} \sqrt{\log_2(T) \mathbb{E}_0[N_i]} + c \cdot \mathbb{E}_0[M_s] \\ &\stackrel{(a)}{\geq} \frac{\epsilon_1 T}{6} - \frac{\epsilon_1^2 T}{\sigma \sqrt{\beta(G_{1:T})}} \sqrt{2 \log_2(T) \mathbb{E}_0[M_s]} + c \cdot \mathbb{E}_0[M_s] \\ &\stackrel{(b)}{\geq} \frac{c^{1/3} \beta(G_{1:T})^{1/3} T^{2/3}}{54 \log_2(T)} - \frac{c^{1/3} \beta(G_{1:T})^{1/3} T^{2/3}}{162 \log_2(T)} \\ &= \frac{c^{1/3} \beta(G_{1:T})^{1/3} T^{2/3}}{81 \log_2(T)}, \end{aligned} \quad (14)$$

where (a) follows from the concavity of  $\sqrt{x}$  and  $\sum_i^{\beta(G_{1:T})} N_i \leq 2M_s$ , (b) follows from the fact that the right hand side is minimized for  $\sqrt{\mathbb{E}_0[M_s]} = \epsilon^2 T \sqrt{\log_2(T)} / 2c\sigma \sqrt{\beta(G_{1:T})}$ . The claim of the theorem now follows.  $\square$

## B Proof of Lemma 2

$\beta(G_{1:T})$  is the cardinality of  $\mathcal{I}(G_{1:T})$ . Let  $1, 2, \dots, \beta(G_{1:T})$  actions belong to the set  $\mathcal{I}(G_{1:T})$ . Then, the adversary selects an action uniformly at random from the set  $\mathcal{I}(G_{1:T})$  say  $j$ , and assigns the loss sequence to action  $j$  using independent Bernoulli random variable with parameter  $0.5 - \epsilon$ , where  $\epsilon = \sqrt{\beta(G_{1:T})/T}$ . For all  $i \in \mathcal{I}(G_{1:T}) \setminus \{j\}$ , losses are assigned using independent Bernoulli random variable with parameter 0.5. For all  $i \notin \mathcal{I}(G_{1:T})$ , the losses are assigned using independent Bernoulli random variable with parameter 1. The proof of the lemma follows along the same lines as Theorem 5 in (Alon et al. (2017)).

## C Proof of Theorem 3

Proof of this theorem uses the result from Theorem 1. Since the loss sequence is assigned independently to each sub-sequence  $U_m$  where  $m \in [M]$ . Using Theorem 1, there exists a constant  $b_m$  such that

$$\begin{aligned} \mathbb{E} \left[ \sum_{t=1}^T (\ell_t(i_t) \mathbf{1}(G_t \in U_m) + cW_m) \right] &- \min_{i \in U_m} \sum_{t=1}^T (\ell_t(i) \mathbf{1}(G_t \in U_m)) \\ &\geq b_m c^{1/3} \beta(U_m)^{1/3} N(U_m)^{2/3} / \log(T), \end{aligned} \quad (15)$$

where  $W_m$  is number of switches performed within the sequence  $U_m$ . Since

$$\sum_{m \in [M]} W_m \leq \sum_{t=1}^T \mathbf{1}(i_t \neq i_{t-1}),$$

there exist a constant  $b$  such that the expected regret of any algorithm  $\mathcal{A}$  is at least

$$b c^{1/3} \sum_{m \in [M]} \beta(U_m)^{1/3} N(U_m)^{2/3} / \log T.$$

## D Proof of Lemma 4

*Proof.* The proof follows from contradiction and is along the same lines as the proof of Theorem 4 in Dekel et al. (2014). Let  $\mathcal{A}$  performs at most  $\tilde{O}((\beta(G_{1:T})^{1/2}T)^\alpha)$  switches for any sequence of loss function over  $T$  rounds with  $\beta + \alpha/2 < 1$ . Then, there exists a real number  $\gamma$  such that  $\beta < \gamma < 1 - \alpha/2$ . Then, assign  $c = (\beta(G_{1:T})^{1/2}T)^{3\gamma-2}$ . Thus, the expected regret, including the switching cost, of the algorithm is

$$\tilde{O}((\beta(G_{1:T})^{1/2}T)^\beta + (\beta(G_{1:T})^{1/2}T)^{3\gamma-2}(\beta(G_{1:T})T)^\alpha) = \tilde{o}(\beta(G_{1:T})^{1/2}T)^\gamma,$$

over a sequence of losses assigned by the adversary because  $\beta < \gamma$  and  $\alpha < 2 - 2\gamma$ . However, according to Theorem 1, the expected regret is at least  $\tilde{\Omega}(\beta(G_{1:T})^{1/3}(\beta(G_{1:T})^{1/2}T)^{(3\gamma-2)/3}T^{2/3}) = \tilde{\Omega}((\beta(G_{1:T})T)^\gamma)$ . Hence, by contradiction, the proof of the lemma follows.  $\square$

## E Proof of Theorem 5

*Proof.* Let  $t_1, t_2, \dots, t_{\sigma(T)}$  be the sequence of time instances at which the event  $E^t$  occurs during the duration  $T$  of the game. We define  $\{r_j = t_{j+1} - t_j\}_{1 \leq j \leq T}$  as the sequence of inter-event times between the events  $E^t$ . Let  $\text{mas}(G_{(1)}), \dots, \text{mas}(G_{(T)})$  denote the sequence in the decreasing order of size of maximal acyclic graphs, i.e.  $\text{mas}(G_{(1)})$  (or  $\text{mas}(G_{(T)})$ ) is the maximum (or minimum) size of maximal acyclic graph observed in sequence  $G_{1:T} = \{G_1, \dots, G_T\}$ . Using the definition of  $E^t$ , note that  $r_j$  is a random variable bounded by  $T^{1/3}c^{2/3}/\text{mas}(G_{(T)})^{1/3}$ . For all  $1 \leq j \leq \sigma(T)$ , the ratio of total weights of actions at round  $t_j$  and  $t_{j+1}$  is

$$\begin{aligned} \frac{W_{t_{j+1}}}{W_{t_j}} &= \sum_{i \in [K]} \frac{w_{i,t_{j+1}}}{W_{t_j}} \\ &= \sum_{i \in [K]} \frac{w_{i,t_j} \exp(-\eta \ell'_{t_j+r_j-1}(i))}{W_{t_j}} \\ &= \sum_{i \in [K]} p_{i,t_j} \exp(-\eta \ell'_{t_j+r_j-1}(i)) \\ &\stackrel{(a)}{\leq} \sum_{i \in [K]} p_{i,t_j} \left( 1 - \eta \ell'_{t_j+r_j-1}(i) + \frac{1}{2} \eta^2 \ell'^2_{t_j+r_j-1}(i) \right) \\ &= 1 - \eta \sum_{i \in [K]} p_{i,t_j} \cdot \ell'_{t_j+r_j-1}(i) + \frac{\eta^2}{2} \sum_{i \in [K]} p_{i,t_j} \cdot \ell'^2_{t_j+r_j-1}(i), \end{aligned} \tag{16}$$

where (a) follows from the fact that, for all  $x \geq 0$ ,  $e^{-x} \leq 1 - x + x^2/2$ . Now, taking logs on both sides of (16), summing over  $t_1, t_2, \dots, t_{\sigma(T)}$ , and using  $\log(1+x) \leq x$  for all  $x > -1$ , we get

$$\log \frac{W_{t_{\sigma(T)+1}}}{W_1} \leq -\eta \sum_{j=1}^{\sigma(T)} \sum_{i \in [K]} p_{i,t_j} \cdot \ell'_{t_j+r_j-1}(i) + \frac{\eta^2}{2} \sum_{j=1}^{\sigma(T)} \sum_{i \in [K]} p_{i,t_j} \cdot \ell'^2_{t_j+r_j-1}(i). \tag{17}$$

For all actions  $k' \in [K]$ , we also have

$$\log \frac{W_{t_{\sigma(T)+1}}}{W_1} \geq \log \frac{w_{k', t_{\sigma(T)+1}}}{W_1} \geq -\eta \sum_{j=1}^{\sigma(T)} \ell'_{t_j+r_j-1}(k') - \log(K). \quad (18)$$

Combining (17) and (18), for all  $k' \in [K]$ , we obtain

$$\sum_{j=1}^{\sigma(T)} \sum_{i \in [K]} p_{i, t_j} \cdot \ell'_{t_j+r_j-1}(i) - \sum_{j=1}^{\sigma(T)} \ell'_{t_j+r_j-1}(k') \leq \frac{\log(K)}{\eta} + \frac{\eta}{2} \sum_{j=1}^{\sigma(T)} \sum_{i \in [K]} p_{i, t_j} \cdot \ell'^2_{t_j+r_j-1}(i). \quad (19)$$

Now, for all  $i \in [K]$ , the conditional expectation of  $\ell'_{t_j+r_j-1}(i)$  is

$$\begin{aligned} \mathbb{E} \left[ \ell'_{t_j+r_j-1}(i) \middle| p_{t_j}, r_j \right] &= \sum_{t=t_j}^{t_j+r_j-1} \sum_{k': i \in S_t(k')} p_{k', t_j} \cdot \frac{\ell_t(i)}{q_{i, t}}, \\ &= \sum_{t=t_j}^{t_j+r_j-1} \frac{\ell_t(i)}{q_{i, t}} \cdot \sum_{k': i \in S_t(k')} p_{k', t_j}, \\ &= \sum_{t=t_j}^{t_j+r_j-1} \ell_t(i). \end{aligned} \quad (20)$$

Therefore, we have that for all  $i \in [K]$ , the conditional expectation

$$\mathbb{E} \left[ \sum_{j=1}^{\sigma(T)} \ell'_{t_j+r_j-1}(i) \middle| \{p_{t_j}, r_j\}_{1 \leq j \leq \sigma(T)} \right] = \sum_{j=1}^{\sigma(T)} \sum_{t=t_j}^{t_j+r_j-1} \ell_t(i) = \sum_{t=1}^T \ell_t(i). \quad (21)$$

Now, the expectation of second term in right hand side of (19) is

$$\begin{aligned} \mathbb{E} \left[ \sum_{j=1}^{\sigma(T)} \sum_{i \in [K]} p_{i, t_j} \cdot \ell'^2_{t_j+r_j-1}(i) \right] &= \mathbb{E} \left[ \sum_{j=1}^{\sigma(T)} \mathbb{E} \left[ \sum_{i \in [K]} p_{i, t_j} \ell'^2_{t_j+r_j-1}(i) \middle| \{p_{t_j}, r_j\}_{1 \leq j \leq \sigma(T)} \right] \right] \\ &\stackrel{(a)}{\leq} \mathbb{E} \left[ \sum_{j=1}^{\sigma(T)} \text{mas}(G_{t_j:t_j+r_j-1}) r_j^2 \right], \end{aligned} \quad (22)$$

where  $\text{mas}(G_{t_j:t_j+r_j-1}) = \max_{n \in [t_j, t_j+r_j-1]} \text{mas}(G_n)$ , and (a) follows from the fact that, for all  $i \in [K]$  and  $t \leq T$ ,  $\ell_t(i) \leq 1$ , and  $\sum_{i \in [K]} p_{i, t} / q_{i, t} \leq \text{mas}(G_t)$  (Alon et al., 2017, Lemma 10).

Now, we bound  $\sum_{j=1}^{\sigma(T)} \text{mas}(G_{t_j:t_j+r_j-1}) r_j^2$ . We write the following optimization problem:

$$\begin{aligned} \max_{\{r_j\}_{1 \leq j \leq T}} \sum_{j=1}^T \text{mas}(G_{t_j:t_j+r_j-1}) r_j^2, \quad \text{subject to} \quad (23) \\ \sum_{j=1}^T r_j = T, \\ 0 \leq r_j \leq \frac{T^{1/3} c^{2/3}}{\text{mas}^{1/3}(G_{(T)})}. \end{aligned}$$

Since the objective function is submodular and the constraints are linear, the ratio of the solution of the greedy algorithm and the optimal solution is at most  $(1 - 1/e)$  (Nemhauser and Wolsey (1978)). Therefore, the optimal solution  $o^*$  of the above optimization problem is

$$o^* \leq \sum_{t=1}^{t^*} \frac{T^{2/3} \text{mas}(G_{(t)}) c^{4/3}}{(1 - 1/e) \text{mas}^{2/3}(G_{(T)})}, \quad (24)$$

where  $t^* = \lceil T^{2/3} c^{-2/3} \text{mas}^{1/3}(G(T)) \rceil$ . Using (19), (20), (21), (22) and (24), we have

$$\mathbb{E} \left[ \sum_{j=1}^{\sigma(T)} \sum_{i \in [K]} p_{i, k_j} \sum_{t=k_j}^{k_j+r_j-1} \ell_t(i) - \sum_{j=1}^T \ell_t(k') \right] \leq \frac{\log(K)}{\eta} + \frac{\eta}{2} \sum_{t=1}^{t^*} \frac{T^{2/3} c^{4/3} \text{mas}(G(t))}{(1-1/e) \text{mas}^{2/3}(G(T))}. \quad (25)$$

Additionally, the player switches its action only if  $E^t$  is true. Thus, using (25) and  $c(i, j) = c$ , for all  $i, j \in [K]$ , we have

$$R^A(l_{1:T}, \mathcal{C}) \leq \frac{\log(K)}{\eta} + \frac{\eta}{2} \sum_{t=1}^{t^*} \frac{T^{2/3} c^{4/3} \text{mas}(G(t))}{(1-1/e) \text{mas}^{2/3}(G(T))} + c \cdot \mathbb{E} \left[ \sum_{t=2}^T \mathbf{1}(i_t \neq i_{t-1}) \right]. \quad (26)$$

Now, we bound  $\mathbb{E}[\sum_{t=2}^T \mathbf{1}(i_t \neq i_{t-1})]$ .  $E_1^t$  occurs with probability 1, and does not contribute to any SC.  $E_2^t$  can lead to at most  $\lceil T^{2/3} c^{-2/3} \text{mas}^{1/3}(G(T)) \rceil$  switches. Now, let  $E_3^t$  causes  $N_T$  switches. Then, we have

$$\begin{aligned} \mathbb{E}[N_T] &= \mathbb{E} \left[ \sum_{j=1}^{\sigma(T)} \mathbf{1}(i_{t_{j+1}} \neq i_{t_j}, E_3^{t_j} \text{ is true}) \right] \\ &= \mathbb{E} \left[ \sum_{j=1}^{\sigma(T)} \mathbb{E} \left[ \mathbf{1}(i_{t_{j+1}} \neq i_{t_j}, E_3^{t_j} \text{ is true}) \middle| \{p_{t_j}, r_j\}_{1 \leq j \leq \sigma(T)} \right] \right] \\ &\leq \mathbb{E} \left[ \sum_{j=1}^{\sigma(T)} \mathbb{E} \left[ \sum_{i \in [K], k' \in [K] \setminus \{i\}} \mathbb{P}(i_{t_j} = i | E_3^{t_j} \text{ is true}) \mathbb{P}(i_{t_{j+1}} = k' | i_{t_j} = i) \middle| \{p_{t_j}, r_j\}_{1 \leq j \leq \sigma(T)} \right] \right] \\ &= \mathbb{E} \left[ \sum_{j=1}^{\sigma(T)} \sum_{i \in [K], k' \in [K] \setminus \{i\}} p_{i, t_j} p_{k', t_{j+1}} \right] \\ &\stackrel{(a)}{\leq} \sum_{t=1}^T c^{-2/3} \text{mas}^{1/3}(G(T)) t^{-1/3} = c^{-2/3} \text{mas}^{1/3}(G(T)) T^{2/3}, \end{aligned} \quad (27)$$

where (a) follows from Lemma 1 in this section. Thus, the number of switches are  $2c^{-2/3} \text{mas}^{1/3}(G(T)) T^{2/3}$ , and the SC is  $2c^{1/3} \text{mas}^{1/3}(G(T)) T^{2/3}$ .

Part (iii) of the theorem follows by combining the results from (i) and (ii). Part (iv) follows from the fact that if  $G_t$  is undirected,  $\text{mas}(G_t) = \alpha(G_t)$ .  $\square$

**Lemma 1.** Given  $i \in [K]$  is chosen at time instance  $t_j$ , for all  $k' \in [K] \setminus \{i\}$ , we have

$$p_{i, t_j} \cdot p_{k', t_{j+1}} \leq (t_{j+1})^{-1/3}.$$

*Proof.* Given  $i$  is chosen at time instance  $t_j$ , for all  $k' \in [K] \setminus \{i\}$ , we have

$$\begin{aligned} \frac{p_{k', t_{j+1}}}{p_{i, t_{j+1}}} &= \frac{p_{k', 1} \exp(-\eta \hat{\ell}_{t_{j+1}}(k'))}{p_{i, t_j} \exp(-\eta \ell'_{t_j+r_j-1}(i))} \\ &\stackrel{(a)}{=} \frac{p_{k', 1} \exp(-\eta(\hat{\ell}_{t_j}(k') + \ell'_{t_j+r_j-1}(k'))) }{p_{i, t_j} \exp(-\eta \ell'_{t_j+r_j-1}(i))} \\ &\stackrel{(b)}{\leq} \frac{\exp(-\eta(\hat{\ell}_{t_j}(k') + \ell'_{t_j+r_j-1}(k') - \ell'_{t_j+r_j-1}(i)))}{p_{i, t_j}} \\ &\stackrel{(c)}{\leq} \frac{\exp(-\eta(\epsilon_{t_{j+1}}/\eta))}{K p_{i, t_j}} \\ &= \frac{\exp(-\epsilon_{t_{j+1}})}{p_{i, t_j}}, \end{aligned} \quad (28)$$

where (a) follows from the fact that  $\hat{\ell}_{t_{j+1}}(k') = \hat{\ell}_{t_j}(k') + \ell'_{t_j+r_j-1}(k')$ ; (b) follows from  $p_{k',1} = 1/K$ ; (c) follows from the fact that for all  $k \in [K] \setminus \{i\}$ ,  $\hat{\ell}_{k,t-1} - \ell'_{i,t-1} > \epsilon_t/\eta$  as the increment in  $\ell'_{i,t-1}$  is bounded by  $1/q_{i,t-1}$ . Now, replacing  $\epsilon_t \geq \log(tc^2/\text{mas}(G_{(T)}))/3$  in (28), we have

$$p_{i,t_j} \cdot p_{k',t_{j+1}} \leq c^{-2/3} \text{mas}^{1/3}(G_{(T)}) t_{j+1}^{-1/3}. \quad (29)$$

□

## F Proof of Theorem 6

*Proof.* We borrow the notations from the proof of Theorem 5. Using the fact that  $\eta_t$  is decreasing in  $t$  and (19), we have

$$\sum_{j=1}^{\sigma(T)} \sum_{i \in [K]} p_{i,t_j} \cdot \ell'_{t_j+r_j-1}(i) - \min_{k' \in [K]} \sum_{j=1}^{\sigma(T)} \ell'_{t_j+r_j-1}(k') \leq \frac{\log(K)}{\eta_T} + \sum_{j=1}^{\sigma(T)} \frac{\eta_{t_j}}{2} \sum_{i \in [K]} p_{i,t_j} \cdot \ell'^2_{t_j+r_j-1}(i). \quad (30)$$

Now, taking expectation on both the sides and using the fact that expectation of the  $\min(\cdot)$  is smaller than the  $\min(\cdot)$  of the expectation, we have

$$\begin{aligned} & \mathbf{E} \left[ \sum_{j=1}^{\sigma(T)} \sum_{i \in [K]} p_{i,t_j} \cdot \ell'_{t_j+r_j-1}(i) \right] - \min_{k' \in [K]} \mathbf{E} \left[ \sum_{j=1}^{\sigma(T)} \ell'_{t_j+r_j-1}(k') \right] \\ & \leq \frac{\log(K)}{\eta_T} + \mathbf{E} \left[ \sum_{j=1}^{\sigma(T)} \frac{\eta_{t_j}}{2} \epsilon_{t_j} \mathbf{E} \left[ \sum_{i \in [K]} p_{i,t_j} \cdot \ell'^2_{t_j+r_j-1}(i) | p_{t_j}, r_j, \mathbf{1}(i_t \text{ is selected using } p_t) \right] \right], \\ & \stackrel{(a)}{\leq} \frac{\log(K)}{\eta_T} + \mathbf{E} \left[ \sum_{j=1}^{\sigma(T)} \frac{\eta_{t_j}}{2} \epsilon_{t_j} \mathbf{E}[\text{mas}(G_{t_j:t_j+r_j-1}) r_j^2 | \mathbf{1}(i_t \text{ is selected using } p_t)] \right], \\ & \stackrel{(b)}{\leq} \frac{\log(K)}{\eta_T} + \mathbf{E} \left[ \sum_{j=1}^{\sigma(T)} \frac{\eta_{t_j}}{2} \epsilon_{t_j} \frac{2 \cdot \text{mas}(G_{t_j:t_j+r_j-1})}{\epsilon_{t_j}^2} \right], \\ & = \frac{\log(K)}{\eta_T} + \mathbf{E} \left[ \sum_{j=1}^{\sigma(T)} \frac{\eta_{t_j}}{2} \frac{2 \cdot \text{mas}(G_{t_j:t_j+r_j-1})}{\epsilon_{t_j}} \right], \\ & \stackrel{(c)}{\leq} \frac{\log(K)}{\eta_T} + \mathbf{E} \left[ \sum_{j=1}^{\sigma(T)} \frac{2 \log(K)}{\text{mas}^{2/3}(G_{(T)})} \text{mas}(G_{(j)}) \right], \\ & \stackrel{(d)}{\leq} \frac{\log(K)}{\eta_T} + \sum_{j=1}^{\mathbf{E}[\sigma(T)]} \frac{2 \log(K)}{\text{mas}^{2/3}(G_{(T)})} \text{mas}(G_{(j)}) \end{aligned} \quad (31)$$

where (a) follows from (22), (b) follows from the fact that since the probability of selecting a new action is at most  $\epsilon_{t_j}$ , the mean and the variance of the geometric random variable  $r_j$  is bounded by  $1/\epsilon_{t_j}^2$  and  $(1 - \epsilon_{t_j})/\epsilon_{t_j}^2$  respectively, (c) follows from the value of  $\eta_t$  and  $\epsilon_t$ , and (d) follows from the fact that  $\text{mas}(G_{(j)})/\text{mas}(G_{(T)})$  is a monotonic non increasing sequence in  $j$ , therefore the summation is a concave function and the inequality follows from the Jensen's inequality.

Now, we bound the  $\mathbf{E}[\sigma(T)]$  in (31). This also gives a bound on the number of switches performed by the algorithm. We have

$$\begin{aligned} \mathbf{E}[\sigma(T)] &= \sum_{t=1}^T \mathbf{E}[\mathbf{1}(i_t \neq i_{t-1})], \\ &\leq \sum_{t=1}^T \epsilon_t, \\ &\leq 0.5 \text{mas}^{1/3}(G_{(T)}) T^{2/3} c^{1/3} \end{aligned} \quad (32)$$

□

## References

- Alon, N., Cesa-Bianchi, N., Gentile, C., Mannor, S., Mansour, Y., and Shamir, O. (2017). Non-stochastic multi-armed bandits with graph-structured feedback. *SIAM Journal on Computing*, 46(6):1785–1826.
- Dekel, O., Ding, J., Koren, T., and Peres, Y. (2014). Bandits with switching costs: T 2/3 regret. In *Proceedings of the forty-sixth annual ACM symposium on Theory of computing*, pages 459–467. ACM.
- Nemhauser, G. L. and Wolsey, L. A. (1978). Best algorithms for approximating the maximum of a submodular set function. *Mathematics of operations research*, 3(3):177–188.
